# Supplementary material for: Using High-Density SNP Array to Investigate Genetic Relationships and Structure of Apple Germplasm in Bosnia and Herzegovina
Source: MDPI journal article supplement (doi:10.3390/horticulturae9050527), 2023-04-23
Supplement: s1 [file s1]

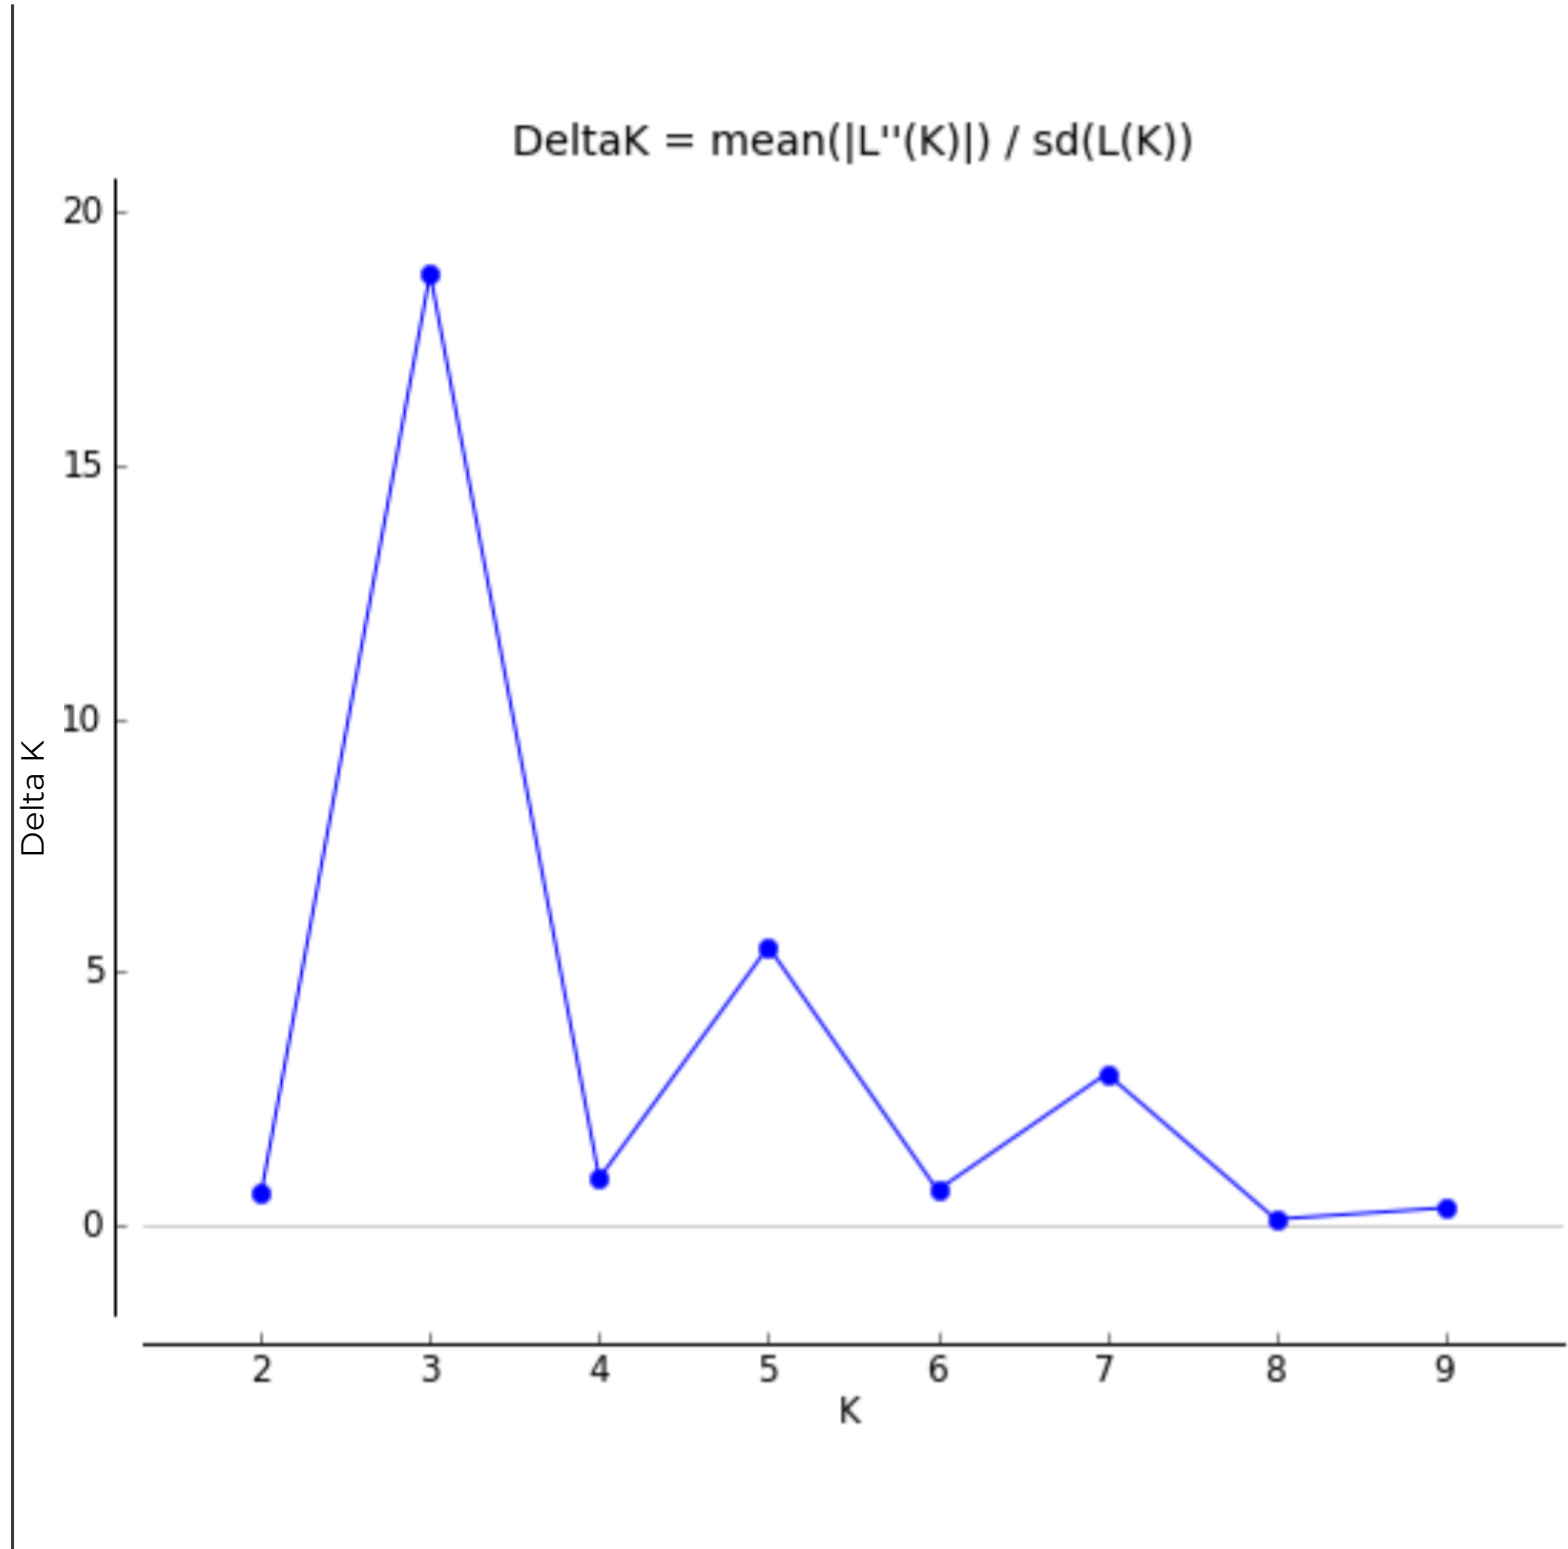

Supplementary Fig. S1 Plot of delta K values from the Structure analysis based on SSR data on 45 apple accessions and international, reference cultivars.
